# Supplementary material for: Description of the first fungal dye-decolorizing peroxidase oxidizing manganese(II)
Source: PubMed Central journal article supplement (PMC4619462; doi:10.1007/s00253-015-6665-3), 2015-05-13
Supplement: 253_2015_6665_MOESM1_ESM.pdf [file 253_2015_6665_MOESM1_ESM.pdf]

SUPPLEMENTAL TABLE AND FIGURE

**Description of the first fungal dye-decolorizing peroxidase oxidizing manganese(II)**

**Elena Fernández-Fueyo, Dolores Linde, David Almendral, María F. López-Lucendo, Francisco J. Ruiz-Dueñas, Angel T. Martínez**

*Centro de Investigaciones Biológicas, CSIC, Ramiro de Maeztu 9, E-28040 Madrid, Spain*

Corresponding author:

A.T. Martínez

E-mail: [ATMartinez@cib.csic.es](mailto:ATMartinez@cib.csic.es)

Phone: +34 918373112 (ext 4407)

Fax: +34 915360432

[http://www.cib.csic.es/lignina/lignina\\_en.html](http://www.cib.csic.es/lignina/lignina_en.html)

**Table S1.** Amino-acid sequence identities between the four DyPs from the *P. ostreatus* genome (JGI protein references included). The number of residue pairs considered for each comparison is shown after the identity percentage.

|                                      | <i>Pleos-DyP4</i> | <i>Pleos-DyP3</i> | <i>Pleos-DyP2</i> | <i>Pleos-DyP1</i> |
|--------------------------------------|-------------------|-------------------|-------------------|-------------------|
| <i>Pleos-DyP1</i> ( <u>62271</u> )   | 39% (190)         | 63% (298)         | 67% (323)         | 100% (497)        |
| <i>Pleos-DyP2</i> ( <u>1092668</u> ) | 39% (191)         | 74% (350)         | 100% (488)        | -                 |
| <i>Pleos-DyP3</i> ( <u>52170</u> )   | 39% (188)         | 100% (474)        | -                 | -                 |
| <i>Pleos-DyP4</i> ( <u>1069077</u> ) | 100% (504)        | -                 | -                 | -                 |

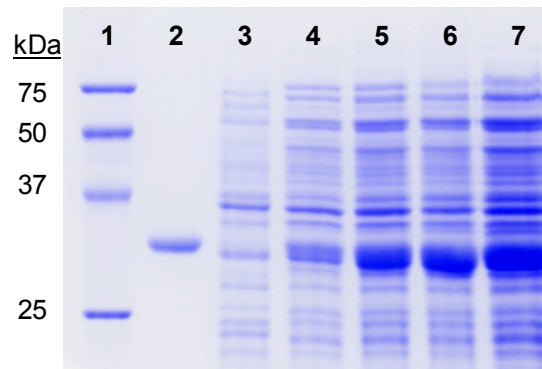

**Fig S1** SDS-PAGE during *Pleos-MnP3* expression in *E. coli*, and after *in vitro* activation and purification. *Lanes 3-7*, time-course of *Pleos-MnP3* overexpression (as inclusion bodies) in IPTG-induced *E. coli* cultures (total proteins 0, 1, 2, 3 and 4 h after induction, respectively). *Lane 1*, purified *Pleos-MnP3* in a single chromatographic step, after the *in vitro* activation of protein from *E. coli* inclusion bodies. *Lane 1*, standards (Fernández-Fueyo et al. 2014d).
